# Supplementary material for: Significant chemiluminescence enhancement by tannic acid functionalised plasmonic silver nanoparticles
Source: Royal Society of Chemistry journal article supplement (doi:10.1039/d4tc01039f), 2024-01-01
Supplement: d4tc01039f1.pdf [file d4tc01039f1.pdf]

## Supporting information

### Significant Chemiluminescence Enhancement by Tannic Acid Functionalised Plasmonic Silver Nanoparticles

Yao Lu,<sup>1</sup> Jiamin Xu,<sup>1</sup> D. Jason Riley,<sup>1</sup> and Fang Xie<sup>\*1</sup>

<sup>1</sup> Materials Department, Imperial College London, London, SW7 2AZ, UK†

\* Corresponding author: f.xie@imperial.ac.uk

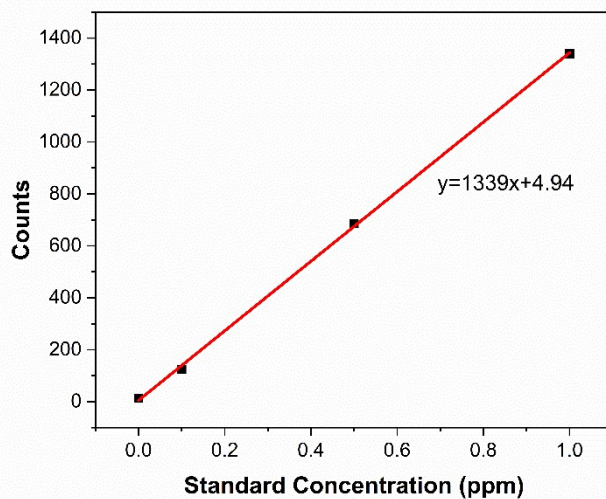

Fig. S1: The ICP-OES calibration curve for Ag ions.

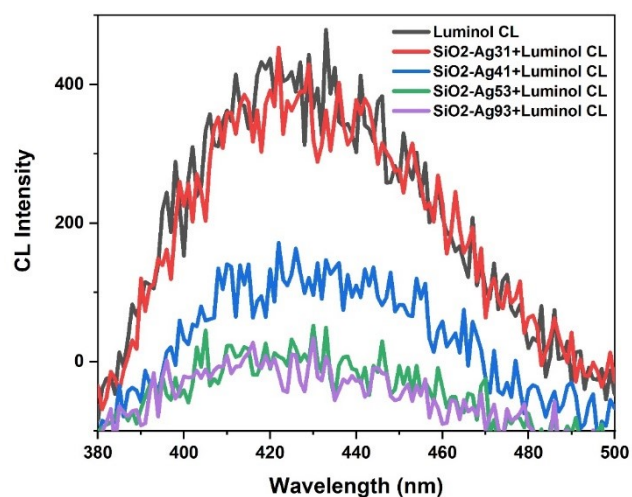

**Fig S2:** The chemiluminescence spectrum of luminol- $\text{H}_2\text{O}_2$  incorporated by silica coated Ag NPs. The silica coatings are 25-35 nm in thickness, which isolates the Ag ion diffusion. The thickness is also too thick as a spacer for plasmonic enhancement, thus, the chemiluminescence test shows quenching for all four Ag sizes.

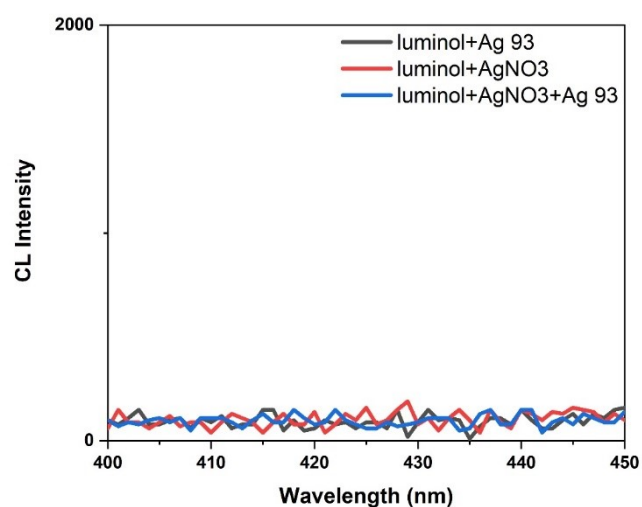

**Fig. S3:** The chemiluminescence spectrum of luminol incorporated by Ag NPs and  $\text{AgNO}_3$ . There is a redox reaction taking place between luminol and  $\text{AgNO}_3$  very slowly. The addition of Ag 93 does not catalyse this process. Therefore, no chemiluminescence signal was measured.

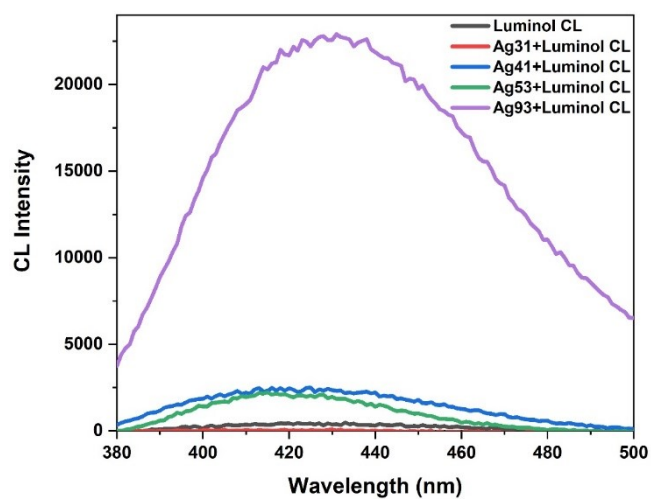

**Fig. S4:** The chemiluminescence spectrum of luminol-H<sub>2</sub>O<sub>2</sub> incorporated by TA-Ag 31-93. The total surface area of TA-Ag 31-93 is the same in each CL test. The result shows that TA-Ag 93 still ranks first in chemiluminescent enhancement.

**Table S1: Calculation of number density for TA-Ag 31-93 from ICP-OES results:**

|                 | <b>Total Mass<br/>(mg/L)</b> | <b>Density of Ag<br/>(mg/nm<sup>3</sup>)</b> | <b>Volume of<br/>one Ag NP<br/>(nm<sup>3</sup>)</b> | <b>Mass of a<br/>single Ag NP<br/>(mg)</b> | <b>No. density of<br/>Ag NPs<br/>(NPs/L)</b> |
|-----------------|------------------------------|----------------------------------------------|-----------------------------------------------------|--------------------------------------------|----------------------------------------------|
| <b>TA-Ag 31</b> | 0.94                         | $1.049 \times 10^{-17}$                      | $1.56 \times 10^4$                                  | $1.63 \times 10^{-13}$                     | $5.72 \times 10^{12}$                        |
| <b>TA-Ag 41</b> | 1.24                         | $1.049 \times 10^{-17}$                      | $3.61 \times 10^4$                                  | $3.79 \times 10^{-13}$                     | $3.26 \times 10^{12}$                        |
| <b>TA-Ag 53</b> | 1.61                         | $1.049 \times 10^{-17}$                      | $7.80 \times 10^4$                                  | $8.18 \times 10^{-13}$                     | $1.97 \times 10^{12}$                        |
| <b>TA-Ag 93</b> | 1.66                         | $1.049 \times 10^{-17}$                      | $4.21 \times 10^5$                                  | $4.42 \times 10^{-12}$                     | $3.76 \times 10^{11}$                        |

**Table S2: Calculation of total surface area density for TA-Ag 31-91 from ICP-OES results.**

|                 | <b>Surface area of<br/>a single Ag NP<br/>(nm<sup>2</sup>)</b> | <b>No. density of<br/>Ag NPs (NPs/L)</b> | <b>Total surface<br/>area (nm<sup>2</sup>/L)</b> |
|-----------------|----------------------------------------------------------------|------------------------------------------|--------------------------------------------------|
| <b>TA-Ag 31</b> | $3.04 \times 10^3$                                             | $5.72 \times 10^{12}$                    | $1.74 \times 10^{16}$                            |
| <b>TA-Ag 41</b> | $5.25 \times 10^3$                                             | $3.26 \times 10^{12}$                    | $1.71 \times 10^{16}$                            |
| <b>TA-Ag 53</b> | $8.86 \times 10^3$                                             | $1.97 \times 10^{12}$                    | $1.75 \times 10^{16}$                            |
| <b>TA-Ag 93</b> | $2.71 \times 10^4$                                             | $3.76 \times 10^{11}$                    | $1.02 \times 10^{16}$                            |
